# Supplementary material
Source: publisher figshare collection journal article supplement (https://tandf.figshare.com/ndownloader/files/12818573)
Supplement: Supplementary file 1 [file 12818573]

**Delinking Rhetorics of Neoliberalism: An Analysis of South American Leftist Presidents’ Speeches**

**Supplemental material: Spanish and Portuguese original excerpts**

1. “There is no turning back in the political revolution that people in the streets are claiming for and that we need to push forward (…). It’s not that kind of revolution. This revolution is different. It no longer sprouts in the mountains with guerrilla groups. No, it springs in the cities from the masses. It’s a mass revolution, but it is peaceful (…). It’s democratic, profoundly democratic” (Chávez, 2009).

*No hay marcha atrás en la revolución política que tenemos que impulsar y que claman las calles del pueblo de toda esta tierra de Bolívar. (…). No es ese tipo de revolución, esta revolución es diferente. Ya no brota en las montañas, con focos guerrilleros. No, brota de las ciudades, de las masas. Es una revolución de masas, pero es pacífica (…). Es democrática, profundamente democrática.*

2. “Democracy means fighting for political reform, listening to society and to the social movements, and seeking public opinion to reinforce the legitimacy of the actions of the Executive”

*Democratizar o poder significa lutar pela reforma política, ouvir com atenção a sociedade e os movimentos sociais e buscar a opinião do povo para reforçar a legitimidade das ações do Executivo*

3. “We understand the so-called Washington Consensus which speaks of liberalizing markets, privatizing companies, and having balanced budgets. That’s something that Chile has done. However, at the same time, what is not in the Washington Consensus is the need to have, along with that growth, concrete public policies aimed at the most disadvantaged sectors and concrete public policies to create a network of social protection without which no country is capable of competing in the world” (Lagos, 2005).

*Es cierto, entendemos que el Consenso de Washington, así denominado, que habla de liberalizar mercados, que habla de privatizar determinadas empresas, que habla de desregular y que habla de tener presupuestos equilibrados, es algo que Chile ha hecho, y en buena hora. Pero, al mismo tiempo, lo que no está en el Consenso de Washington es la necesidad de tener, con ese crecimiento, políticas públicas concretas, dirigidas a los sectores más desfavorecidos, políticas públicas concretas para crear una red de protección social, sin la cual ningún país es capaz de competir en el mundo.*

4. “We know that the market organizes economically, but not socially. We must ensure that the State guarantees equality where the market excludes and abandons” (Néstor, 2003).

*Sabemos que el mercado organiza económicamente, pero no socialmente, debemos hacer que el Estado ponga igualdad allí donde el mercado excluye y abandona. (Aplausos).*

5. “Some people do not like the Kyoto agreements. I have told the leaders of these countries: ‘O.K., but tell me then, where do I turn to complain about what is happening to the world? Because what happens in my country is a problem that originates outside my country’” (Lagos, 2005).

*A algunos no le gustan los Acuerdos de Kyoto. Le he dicho a los líderes de esos países "me parece bien, pero dígame, entonces, ¿a dónde recurro yo a reclamar de lo que está ocurriendo en el mundo, porque lo que ocurre en mi país es un problema externo a mi país".*

6. “dogma that created plasticine democracies (…) and subjected people, lives, and societies to the market entelechies” (Correa, 2003).

*…Superado el dogma neoliberal y las democracias de plastilina que sometieron personas, vidas y sociedades a las entelequias del mercado.*

7. “We constitute the empirical evidence that there is life after the [International Monetary] Fund; we are proof that there are other ways to development; we have shown the inaccuracy of the application of model recipes that claim universal validity” (Kirchner, 2003).

*Constituimos hoy la prueba empírica de que hay vida después del Fondo, la certificación de que hay otros caminos hacia el desarrollo y la integración, la constancia de la inexactitud de la aplicación de recetas modélicas con pretensión de validez universal.*

8. “We Latin Americans –to the tumbles– are trying to build bigger markets. But, how hard it is! We are a balkanized family who wants to get together but cannot. We have made beautiful countries, but still fail to make the Great Latin American Motherland” (Mujica, 2010).

*Los latinoamericanos, un poco a los tumbos, estamos intentando construir mercados más grandes ¡Pero cómo nos cuesta!! Somos una familia balcanizada, que quiere juntarse, pero no puede. Hicimos, tal vez, muchos hermosos países, pero seguimos fracasando en hacer la Patria Grande.*

9. “great motherland with no walls” (Lugo, 2008).

*A propósito, nuestro proyecto cree en la integración, cree en la poesía de la patria sin murallas, cree obstinadamente en la ecuación de fronteras fértiles antes que oclusivas.*

10. “Peru will establish a new relationship between the State and the market, different from the failed extreme recipes of interventionist states and those from the minimal and excluding governments” (Humala, 2011).

*El Perú establecerá una nueva relación entre el Estado y el mercado, distinta de las fracasadas recetas extremas de los Estados intervencionistas o de los gobiernos mínimos y excluyentes.*

11. “Is it possible to speak of solidarity and to say that we are all together in an economy based on ruthless competition? How far does our fraternity go?” (Mujica, 2010).

*¿Es posible hablar de solidaridad y de que “estamos todos juntos” en una economía basada en la competencia despiadada? ¿Hasta dónde llega nuestra fraternidad?*

12. “rescue human dignity” (Lula, 2003).

*Em face do clamor dos que padecem o flagelo da fome, deve prevalecer o imperativo ético de somar forças, capacidades e instrumentos para rescatar a dignidade humana.*

13. “Brazil knows the wealth of the mills and plantations of sugarcane from the early days of the Colony, but then it didn’t beat hunger. It proclaimed the national independence and abolished slavery, but didn’t beat hunger. It benefited from the goldfields in Minas Gerais and from the production of coffee in the Piraíba valley, but it didn’t beat hunger. It became industrialized and forged a remarkable industrial park, but it didn’t beat hunger.This cannot continue!” (Lula, 2003).

*O Brasil conheceu a riqueza dos engenhos e das plantações de cana-de-açúcar nos primeiros tempos coloniais, mas não venceu a fome; proclamou a independência nacional e aboliu a escravidão, mas não venceu a fome; conheceu a riqueza das jazidas de ouro, em Minas Gerais, e da produção de café, no Vale do Paraíba, mas não venceu a fome; industrializou-se e forjou um notável e diversificado parque produtivo, mas não venceu a fome. Isso não pode continuar assim.*

14. “hold back South America in premodernity” (Mujica, 2013).

*El hecho es que cultivamos arcaísmos feudales, cortesanismos consentidos, hacemos diferenciaciones jerárquicas que en el fondo socavan lo mejor que tienen las repúblicas: que nadie es más que nadie. El juego de estos y otros factores nos retienen en la premodernidad. Y hoy es imposible renunciar a la guerra cuando la política fracasa. Así se estrangula la economía, derrochamos recursos.*

15. “we have been diverted from our destination” (Lagos, 2005).

*Hemos sido a veces desviados de nuestro camino.*

16. “We are beginning a new chapter in our history in which Brazil is not a submissive nation anymore” (Lula, 2003).

*E, para isso, basta acreditar em nós mesmos, em nossa força, em nossa capacidade de criar e em nossa disposição para fazer. Estamos começando hoje um novo capítulo na História do Brasil, não como nação submissa, abrindo mão de sua soberania, não como nação injusta, assistindo passivamente ao sofrimento dos mais pobres, mas como nação altiva, nobre, afirmando-se corajosamente no mundo como nação de todos, sem distinção de classe, etnia, sexo e crença.*

17. “Cocaine can no longer be an excuse of the US government to continue subjecting our peoples” (Morales, 2006).

*…que la cocaína no sea una excusa para que el gobierno de Estados Unidos domine o someta a nuestros pueblos.*

18. “They [Americans] must understand that this dignified and sovereign America is no

longer the backyard of anyone (…). Our nation is no longer for sale”(Correa, 2003).

*Todo esto no se trata de una coincidencia, peor aún de ingenuidad, sino que responde a una visión política, de doble moral, que se ha aplicado en nuestra región desde siempre, pero deben entender que esta América digna, soberana ya no es patio trasero de nadie (…). La Patria ya no está en venta*

19. “What would our Latin America be if the United States hadn’t put its claws on us to impose its model?” (Chávez, 2009).

*Uno se pregunta a veces –yo una vez le preguntaba a Lula, “Lula ¿qué sería de América hoy, la latina, la nuestra, si EEUU, los gobiernos, pues, de EEUU no hubiesen metido sus garras en nuestra América para imponer un modelo, ¡cercenando a sangre y fuego la esperanza y la lucha de muchos pueblos de millones, apagando las luces del amanecer!?”*

20. “Autonomy is not an invention; it’s the struggle of the indigenous peoples across the Americas for that self-determination since the days of the Colony” (Morales, 2006).

*Autonomía no es invento de nadie, es la lucha de los pueblos indígenas de toda América por esa autodeterminación.*
